# Supplementary material for: Life‐long impairment of glucose homeostasis upon prenatal exposure to psychostimulants
Source: PubMed Central journal article supplement (PMC6939201; doi:10.15252/embj.2018100882), 2019-11-21
Supplement: EMBJ-39-e100882-s002.pdf [file EMBJ-39-e100882-s002.pdf]

## Expanded View Figures

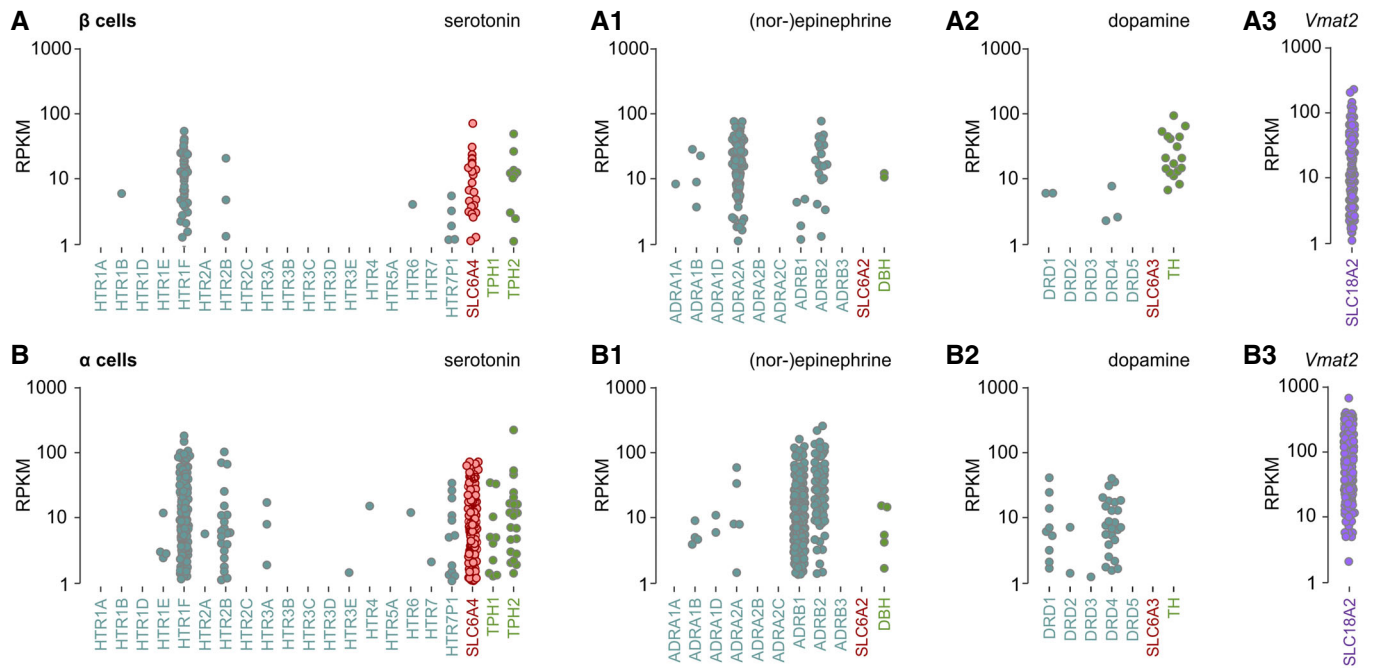

**Figure EV1. Single-cell RNA-seq-based reconstruction of monoamine signaling in human pancreatic  $\beta$  cells.**

A, B Single-cell RNA-seq analysis of  $\beta$  (A-A<sub>3</sub>) and  $\alpha$  cells (B-B<sub>3</sub>) from healthy ( $n = 6$ ) and type 2 diabetic ( $n = 4$ ) donors revealed the presence (or lack) of molecular determinants for serotonin, epinephrine/norepinephrine, and dopamine signaling. Note particular differences in serotonin transporter (SLC6A4), tryptophan hydroxylase (TPH2), and tyrosine hydroxylase (TH) expression between  $\beta$  and  $\alpha$  cells. Expression of the vesicular monoamine transporter (VMAT2), which is non-selective for monoamines, was plotted separately (A<sub>3</sub>, B<sub>3</sub>). Data were expressed as  $\log_2$  reads per kilobase of transcript per million mapped reads (RPKM). Data were re-processed from an open-source database (Segerstolpe *et al*, 2016).

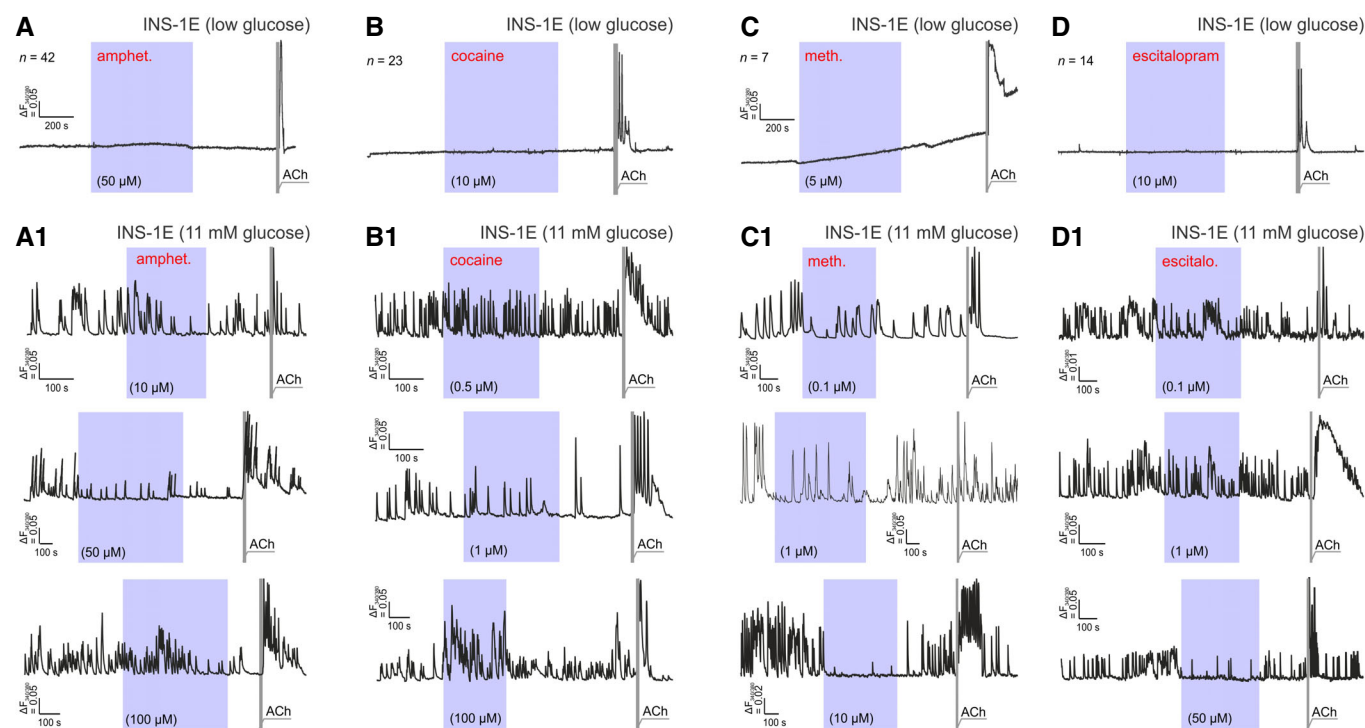

**Figure EV2. Psychostimulants reduce glucose-induced  $\text{Ca}^{2+}$  oscillations in INS-1E cells.**

A–D INS-1E cells do not produce spontaneous  $\text{Ca}^{2+}$  oscillations in the presence of 3 mM glucose. When applied in low glucose (3 mM)-containing medium, none of the psychostimulants affected intracellular  $\text{Ca}^{2+}$  in INS-1E cells either. The time of superfusion at specific drug concentrations is marked as shaded purple background. Acetylcholine (ACh; 5  $\mu\text{M}$ ) was used as positive control throughout. (A1, B1, C1, D1) Representative recordings of intracellular  $\text{Ca}^{2+}$  oscillations in 11 mM glucose with the drug concentrations indicated. All drugs were applied acutely by superfusion. Quantitative data on the amplitude and frequency of intracellular  $\text{Ca}^{2+}$  oscillations are shown in Fig 3.

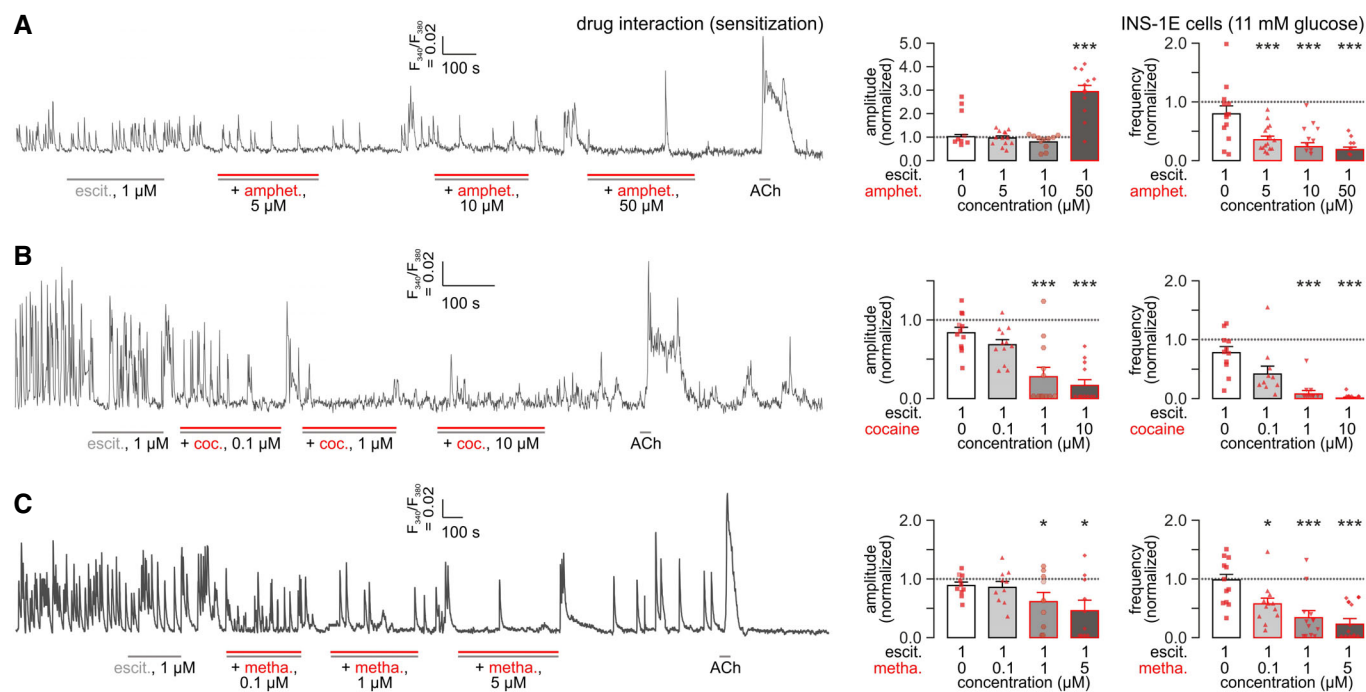

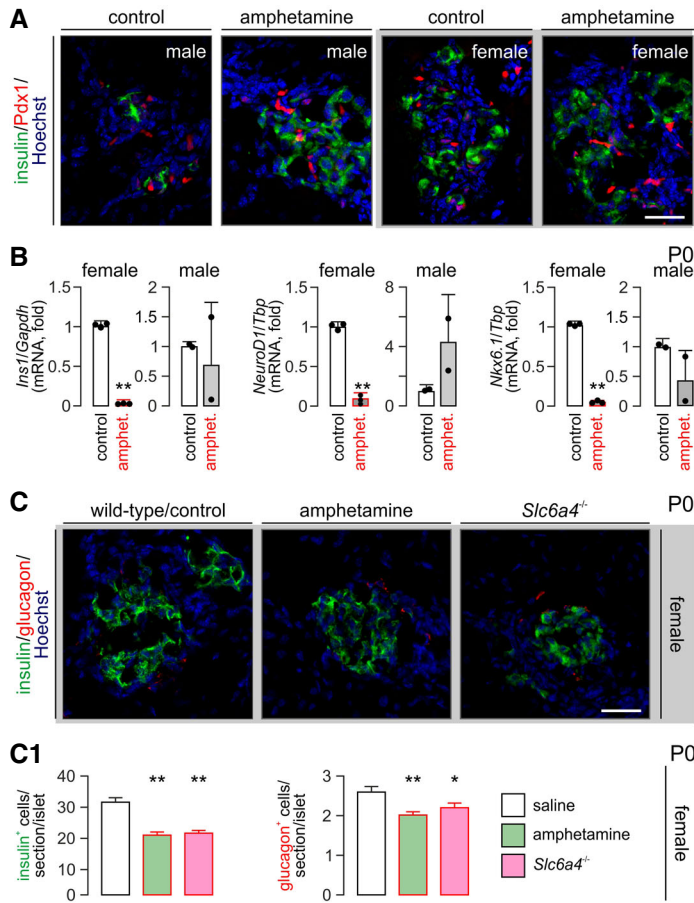

**Figure EV4. Consequences of intrauterine amphetamine exposure on select transcription factors at birth and in *Slc6a4*<sup>-/-</sup> mice.**

- A No significant difference was noted in the number of histochemically detectable Pdx1<sup>+</sup> cells prenatally exposed to amphetamine versus vehicle-treated controls at P0. An effect of sex was not observed either.
- B Real-time PCR experiments pointed to a sex-independent reduction of *Ins1*, *NeuroD1*, and *Nkx6.1* mRNAs in pancreata from P0 mice. Note that amphetamine in all cases induced a marked reduction albeit reaching statistical significance ( $n = 3$  animals/sex/group).
- C In female offspring, *Slc6a4* knock-out seemed to phenocopy the effect of intrauterine amphetamine exposure by significantly reducing the number of insulin<sup>+</sup>  $\beta$  cells (C1). Note that  $\alpha$  cells were also adversely affected in this experiment.  $n \geq 3$  animals/sex/group.

Data information: Scale bar = 40  $\mu$ m (C), 25  $\mu$ m (A). Data were expressed as means  $\pm$  SEM. \*\* $P < 0.01$ , \* $P < 0.05$  (pair-wise comparisons after one-way ANOVA).

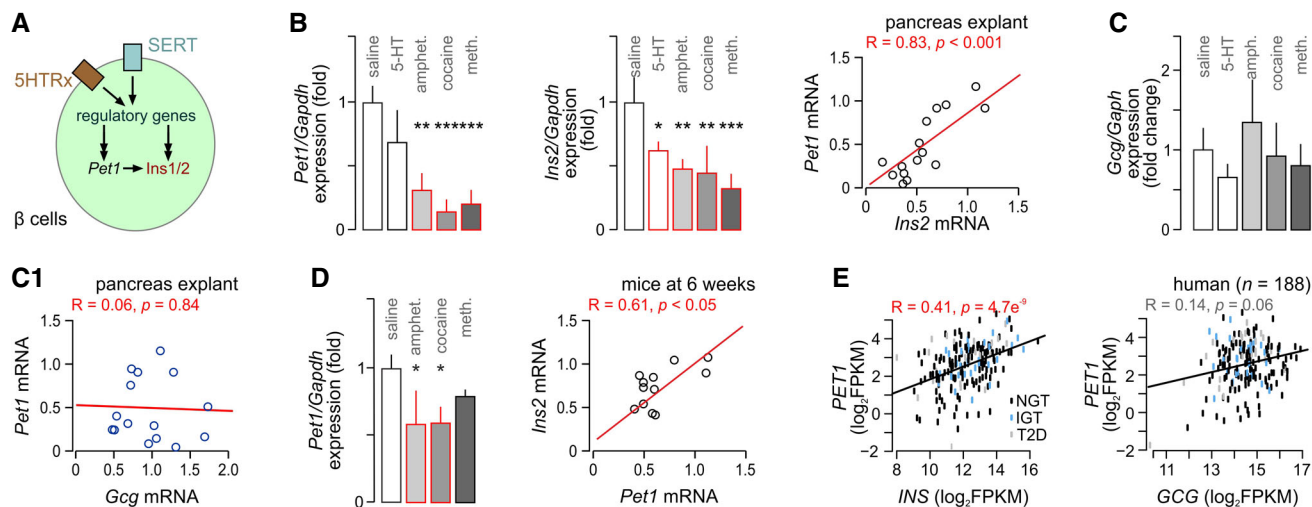

**Figure EV5. Prenatal psychostimulant exposure concordantly reduces *Pet1/Feu* and insulin expression.**

- A Schematic outline of a 5-HT-dependent mechanism inducing changes in insulin (*Ins1/2* in mouse) production independently or through the transcription factor *Pet1/Feu*. Note that 5-HT receptors (5HTRx, non-specified subclass) could contribute by affecting regulatory genes upstream from either *Pet1/Feu* or *Ins1/2*, or both. Likewise, the serotonin transporter (SERT) could affect *Pet1/Feu* or *Ins1/2* directly or through upstream regulatory elements (indirect cascade).
- B *Ex vivo* treatment with psychostimulants but 5-HT significantly decreased both *Pet1/Feu* (left) and *Ins2* (middle) mRNA levels in fetal pancreatic explants. In these experiments, *Pet1/Feu* and *Ins2* mRNA expression positively correlated (right).
- C None of the treatments affected glucagon (*Gcg*) expression, which did not correlate with that of *Pet1/Feu* either (C1).
- D *Pet1/Feu* expression (left) and its correlation with *Ins2* in 6-week-old offspring prenatally exposed to the psychostimulants indicated.
- E Positive Spearman's correlation between PET1/FEV and INS but not GCG mRNA levels in pancreatic islets from healthy (normoglycemic; NGT in black) and diabetic donors (impaired glucose tolerance (IGT; blue) and diabetic (T2D; gray)). Data were expressed as log<sub>2</sub> fragments per kilobase million (FPKM).

Data information: Quantitative data from  $n \geq 3$  explants or mice/group were expressed as means  $\pm$  SD, \*\*\* $P < 0.001$ , \*\* $P < 0.01$ , \* $P < 0.05$  (pair-wise comparison after one-way ANOVA).
